# Supplementary material
Source: PubMed Central journal article supplement (PMC6410727)

**A**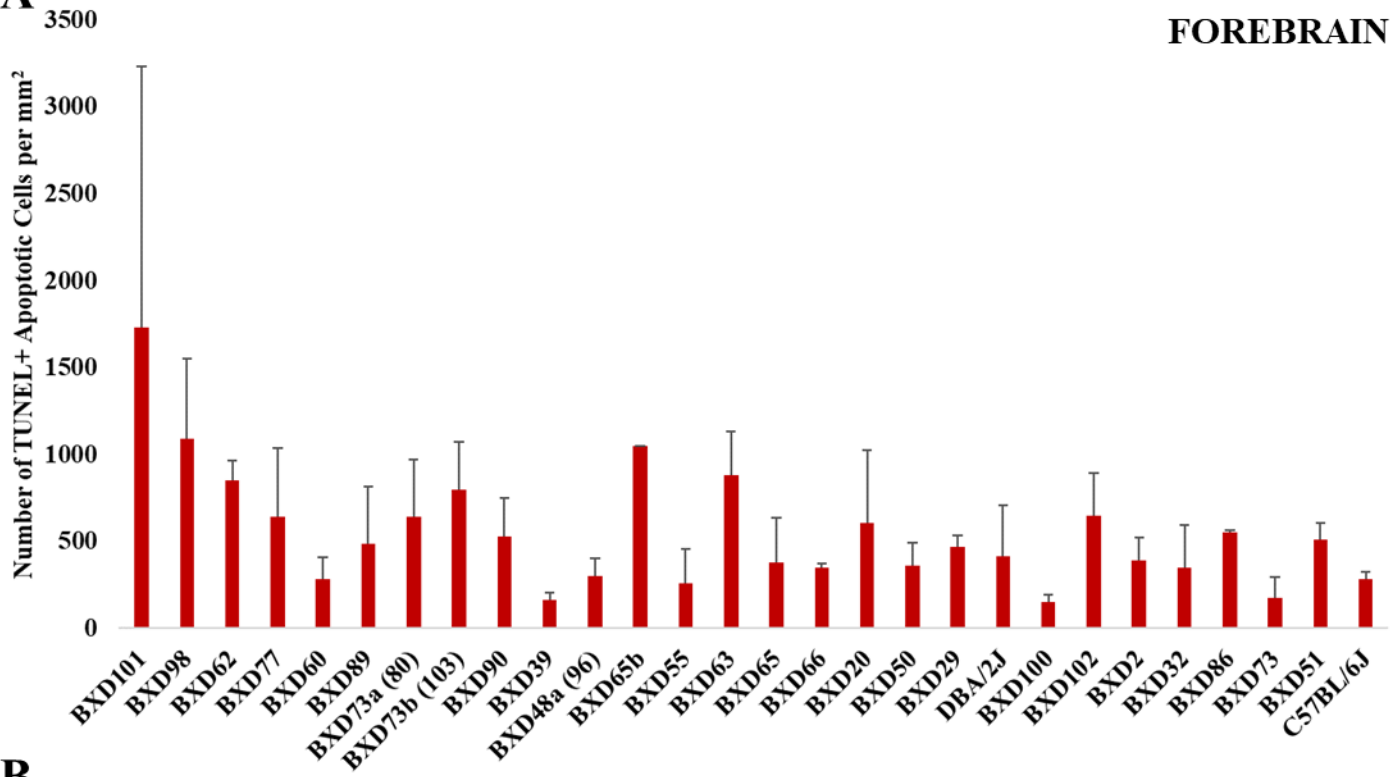**B**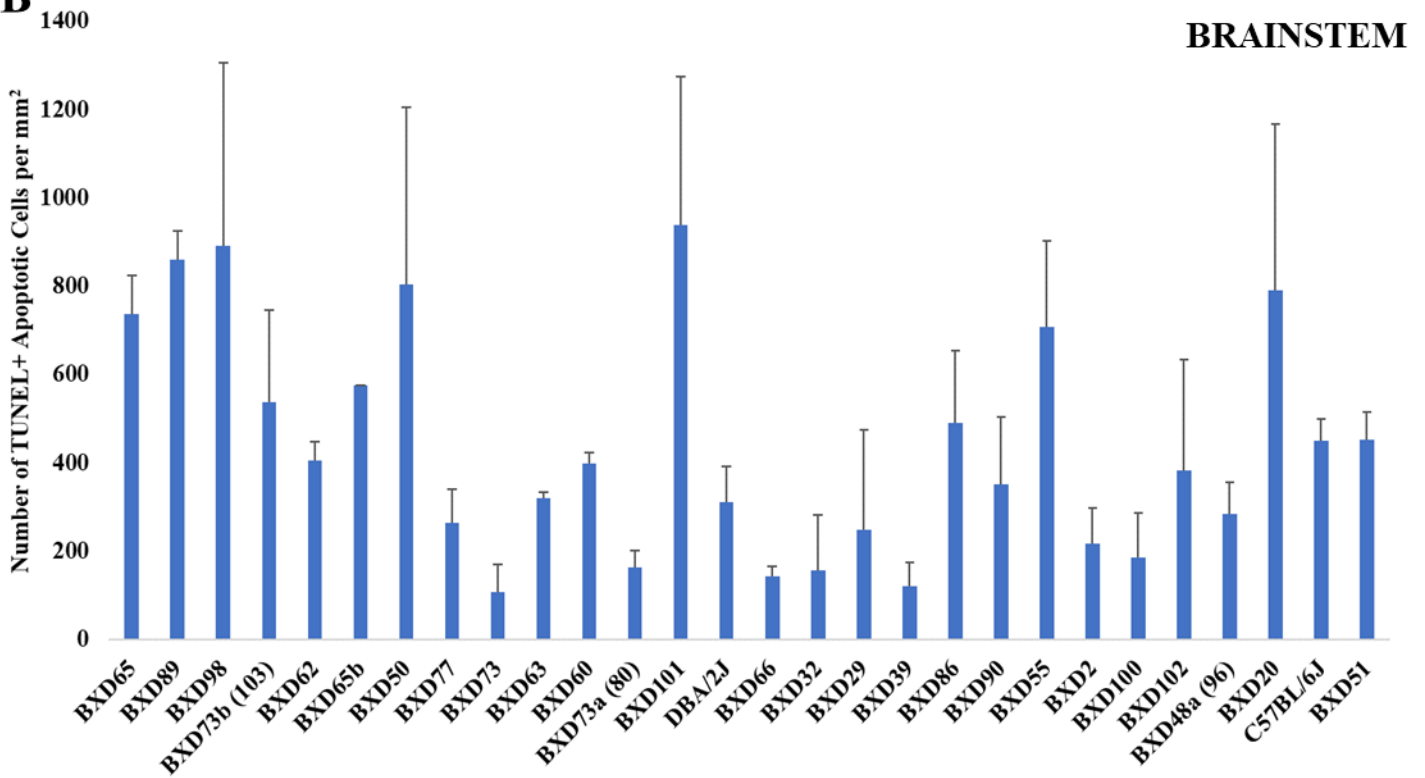

Supplement: NIHMS1003881-supplement-Supp_figS1.pdf [file NIHMS1003881-supplement-Supp_figS1.pdf]
